# Supplementary material for: Akkermansia muciniphilaattenuated lipopolysaccharide-induced acute lung injury by modulating the gut microbiota and SCFAs in mice
Source: Royal Society of Chemistry journal article supplement (doi:10.1039/d3fo04051h), 2023-01-01
Supplement: d3fo04051h1.pdf [file d3fo04051h1.pdf]

### Supplemental Material

**Supplemental Table S1.** Primer sequences used for Real-time PCR analysis, *A. muciniphila* quantification and 16S rRNA.

| Gene            | Forward Sequence (5'-3') | Reverse Sequence (5'-3') |
|-----------------|--------------------------|--------------------------|
| <b>Gapdh</b>    | TGGTGAAGCAGGCATCTGAG     | TGCTGTTGAAGTCGCAGGAG     |
| <b>β-actin</b>  | GGAGAGAAGGGAACCAAAGG     | AGGGAAGCCAGTCATAACCAG    |
| <b>ZO-1</b>     | ACCCGAAACTGATGCTGTGGATAG | AAATGGCCGGGCAGAACTTGTGTA |
| <b>Occludin</b> | GGAGGACTGGGTCAGGGAATA    | CGTCGTCTAGTTCTGCCTGT     |
| <b>MUC2</b>     | GAAGCCAGATCCCGAAACCA     | GAATCGGTAGACATCGCCGT     |
| <b>TLR2</b>     | ACCAAGATCCAGAAGAGCCA     | CATCACCGGTCAGAAAACAA     |
| <b>TLR4</b>     | CACCAGGAAGCTTGAATCCCT    | GGAATGTCATCAGGGACTTTGC   |
| <b>TLR5</b>     | GCAGGATCATGGCATGTCAAC    | ATCTGGGTGAGGTTACAGCCT    |
| <b>MYD88</b>    | CCGCCTATCGCTGTTCTTGA     | GCCAGGCATCCAACAAACTG     |
| <b>NF-κB</b>    | CTGGGCACCAGTTCGATGG      | TGACAGCATAAGGCACACACT    |

| Quantification.                | Forward Sequence (5'-3') | Reverse Sequence (5'-3') |
|--------------------------------|--------------------------|--------------------------|
| <i>Akkermansia muciniphila</i> | CAGCACGTGAAGGTGGGGAC     | CCTTGCGGTTGGCTTCAGAT     |

| Lung 16S rRNA primer        | Forward Sequence (5'-3') | Reverse Sequence (5'-3') |
|-----------------------------|--------------------------|--------------------------|
| <b>Amplification primer</b> | AGAGTTTGATCCTGGCTCAG     | GNTACCTTGTTACGACTT       |
| <b>16S rRNA V3V4</b>        | CCTAYGGGRBGCASCAG        | GGACTACNNGGGTATCTAAT     |

| Feces 16S rRNA primer | Forward Sequence (5'-3') | Reverse Sequence (5'-3') |
|-----------------------|--------------------------|--------------------------|
| <b>16S rRNA V3V4</b>  | TACGGRAGCAGAG            | AAGGTATCTAATCCT          |

**Supplemental Table S2.** List of antibodies and ELISA kit we used

| <b>Antibody name</b>                            | <b>Catalog number</b> | <b>Manufacturer</b>                   |
|-------------------------------------------------|-----------------------|---------------------------------------|
| <b>Anti-Myeloperoxidase antibody</b>            | ab208670              | Abcam, Cambridge, UK                  |
| <b>Anti-Ly6g antibody</b>                       | ab238132              | Abcam                                 |
| <b>F4/80 Rabbit mAb</b>                         | 70076S                | Cell Signaling Technology, MA,<br>USA |
| <b>Anti-ZO1 tight junction protein antibody</b> | ab221547              | Abcam                                 |
| <b>Anti-Occludin antibody</b>                   | ab216327              | Abcam                                 |

  

| <b>ELISA kit name</b>                           | <b>Catalog number</b> | <b>Manufacturer</b>             |
|-------------------------------------------------|-----------------------|---------------------------------|
| <b>Mouse LBP ELISA Assay kit</b>                | <b>ab269542</b>       | <b>Abcam, Cambridge, UK</b>     |
| <b>SOD Determination Kit</b>                    | <b>19160</b>          | <b>Sigma-Aldrich, PA, USA</b>   |
| <b>Lipid Peroxidation (MDA) Assay kit</b>       | <b>ab118970</b>       | <b>Abcam</b>                    |
| <b>Mouse IL-1 beta ELISA kit</b>                | <b>ab197742</b>       | <b>Abcam</b>                    |
| <b>Mouse IL-6 ELISA kit</b>                     | <b>ab222503</b>       | <b>Abcam</b>                    |
| <b>Enhanced BCA Protein Assay Kit</b>           | <b>P0010</b>          | <b>Beyotime, Nanjing, China</b> |
| <b>Lactate Dehydrogenase Activity Assay Kit</b> | <b>MAK066</b>         | <b>Sigma-Aldrich</b>            |

**Supplementary Table S3.** List of hub genes in PPI network of AKK vs PC.

| Hub gene in cluster 1 | Log2(fold change) in transcriptome (AKK vs PC) | P-value  | Regulation    |
|-----------------------|------------------------------------------------|----------|---------------|
| Tnf                   | -3.204178297                                   | 0.000437 | downregulated |
| Lilr4b                | -1.56858339                                    | 0.000758 | downregulated |
| Bcl2a1b               | -1.182020434                                   | 0.033646 | downregulated |
| Bdkrb1                | -1.368309161                                   | 0.005198 | downregulated |
| C5ar1                 | -1.132436864                                   | 0.011974 | downregulated |
| Casp1                 | -0.796837191                                   | 0.024685 | downregulated |
| Ccl2                  | -2.755376319                                   | 0.00055  | downregulated |
| Ccl20                 | -2.077085304                                   | 0.008089 | downregulated |
| Ccl4                  | -2.9897643                                     | 0.000583 | downregulated |
| Ccl9                  | -1.103842508                                   | 0.004593 | downregulated |
| Ccr1                  | -1.605465072                                   | 0.001736 | downregulated |
| Cd44                  | -0.489276361                                   | 0.042579 | downregulated |
| Clec4n                | -1.028954585                                   | 0.036211 | downregulated |
| Csf1r                 | -0.889786024                                   | 0.033982 | downregulated |
| Cxcl1                 | -3.446320805                                   | 9.54E-05 | downregulated |
| Cxcl13                | -2.072900146                                   | 0.012533 | downregulated |
| Cxcl2                 | -4.762465368                                   | 1.63E-08 | downregulated |
| Cxcl3                 | -3.287514873                                   | 0.012122 | downregulated |
| Cxcl5                 | -3.166892054                                   | 0.019528 | downregulated |
| Cxcl9                 | -3.062643588                                   | 0.035634 | downregulated |
| Cxcr2                 | -1.218714173                                   | 5.04E-07 | downregulated |
| Cyba                  | -0.934063339                                   | 0.022981 | downregulated |
| Fcer1g                | -1.22672505                                    | 0.002777 | downregulated |
| Fcgr3                 | -1.513609542                                   | 0.020028 | downregulated |
| Fcgr4                 | -1.526164474                                   | 0.000245 | downregulated |
| Fpr1                  | -1.587359181                                   | 0.000137 | downregulated |
| Fpr2                  | -2.431193418                                   | 8.19E-08 | downregulated |
| Gbp2                  | -2.270570645                                   | 0.000259 | downregulated |
| Gbp3                  | -1.653222049                                   | 0.00541  | downregulated |
| Gbp7                  | -1.423049728                                   | 0.003462 | downregulated |
| H2-T23                | -0.948575564                                   | 0.001729 | downregulated |
| Ifi204                | -1.550758675                                   | 0.000341 | downregulated |
| Ifi47                 | -1.574378091                                   | 0.006589 | downregulated |
| Ifit1                 | -1.603991179                                   | 0.025082 | downregulated |
| Igtp                  | -2.114969267                                   | 0.0013   | downregulated |
| Il10                  | -2.242997239                                   | 0.0008   | downregulated |
| Il10ra                | -0.866464085                                   | 0.038821 | downregulated |
| Il12b                 | -2.563852551                                   | 0.026182 | downregulated |
| Il1b                  | -1.732200367                                   | 0.027157 | downregulated |
| Irf7                  | -1.458434548                                   | 0.004253 | downregulated |

|        |              |          |              |
|--------|--------------|----------|--------------|
| Irgm1  | -1.725155188 | 0.000926 | downreglated |
| Isg15  | -1.771824711 | 0.00819  | downreglated |
| Itgb2  | -0.851837193 | 0.048566 | downreglated |
| Jak2   | -0.629473342 | 0.042668 | downreglated |
| Ncf2   | -1.028940823 | 7.23E-05 | downreglated |
| Ncf4   | -1.333298366 | 0.001234 | downreglated |
| Nfkbia | -1.007011003 | 0.000208 | downreglated |
| Oas1a  | -1.060446107 | 0.042144 | downreglated |
| Oas2   | -1.253894038 | 0.008611 | downreglated |
| Oas3   | -1.678403454 | 0.001334 | downreglated |
| Pilra  | -0.915902476 | 0.023157 | downreglated |
| Ptafr  | -1.337969712 | 0.047313 | downreglated |
| Samhd1 | -0.963400283 | 0.000437 | downreglated |
| Socs3  | -1.311406039 | 0.000141 | downreglated |
| Stat1  | -1.167318807 | 0.040327 | downreglated |
| Stat3  | -0.441735523 | 0.003959 | downreglated |
| Tap1   | -1.357642406 | 0.001485 | downreglated |
| Tlr2   | -1.704103478 | 0.000516 | downreglated |
| Tlr4   | -0.456311223 | 0.02522  | downreglated |
| Tyrobp | -0.877675879 | 0.033216 | downreglated |
| Vav1   | -1.062063524 | 0.029035 | downreglated |
| Zbp1   | -1.840291657 | 0.00375  | downreglated |

---

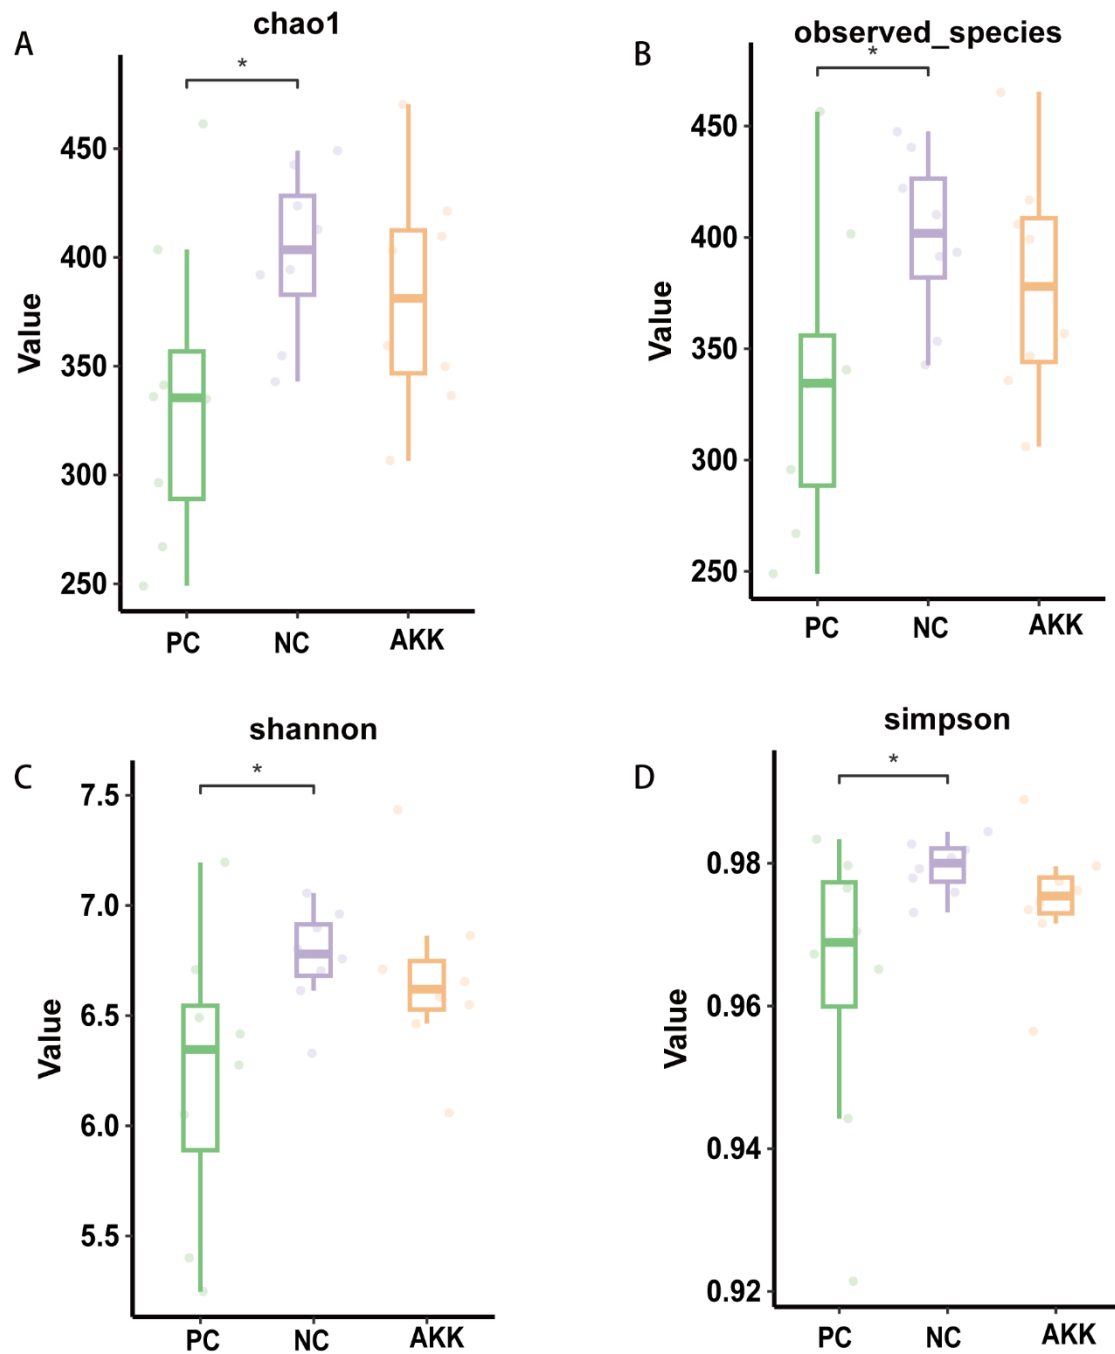

**Supplementary Figure 1** The alpha-diversity indexes including Chao1 index(A), observed species index(B), Shannon index(C), and Simpson index) (D) of the gut microbiota among three groups were showed. Data are shown as the mean  $\pm$  SEM; Compared with the PC group, \*  $p < 0.05$ . NC, PBS + saline group; PC, PBS+LPS group; AKK, *A. muciniphila* + LPS group.  $n=8$  each group.

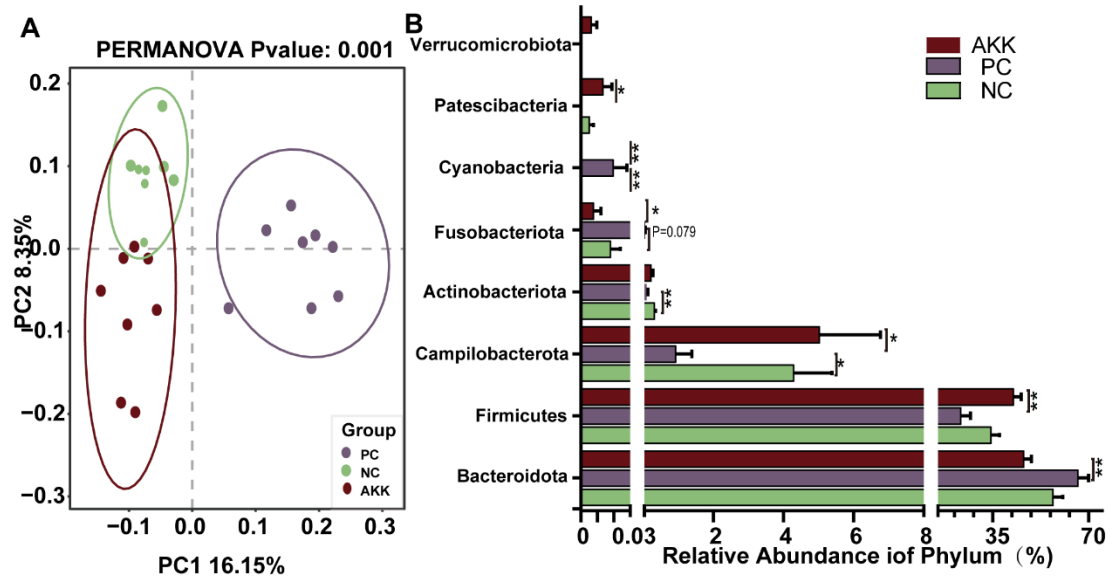

**Supplementary Figure 2 *A. muciniphila* reshaped the gut microbiota of mice.**

(A) A PCoA based on unweighted UniFrac distances showed that the microbial groups of AKK, NC, and LPS were significantly separated ( $p < 0.01$ ). (B) Comparisons of the relative abundances of intestinal microbiota between the three groups were performed at the phylum levels. Data are shown as the mean  $\pm$  SEM; Compared with the PC group, \*  $p < 0.05$ , \*\*  $p < 0.01$ , and \*\*\*  $p < 0.001$ . NC, PBS + saline group; PC, PBS+LPS group; AKK, *A. muciniphila* + LPS group.  $n=8$  each group.

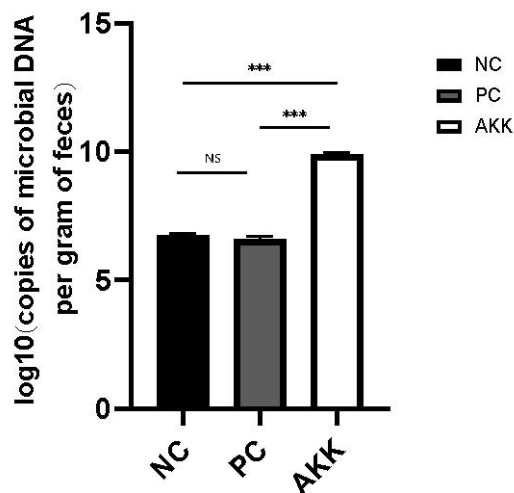

**Supplementary Figure 3 A. *muciniphila* load in the feces was measured 21 days of gavage.** Data are presented as the mean  $\pm$  SEM; Compared with the PC group, \*  $p < 0.05$ . NC, PBS + saline group; PC, PBS+LPS group; AKK, *A. muciniphila* + LPS group.  $n=8$  each group.

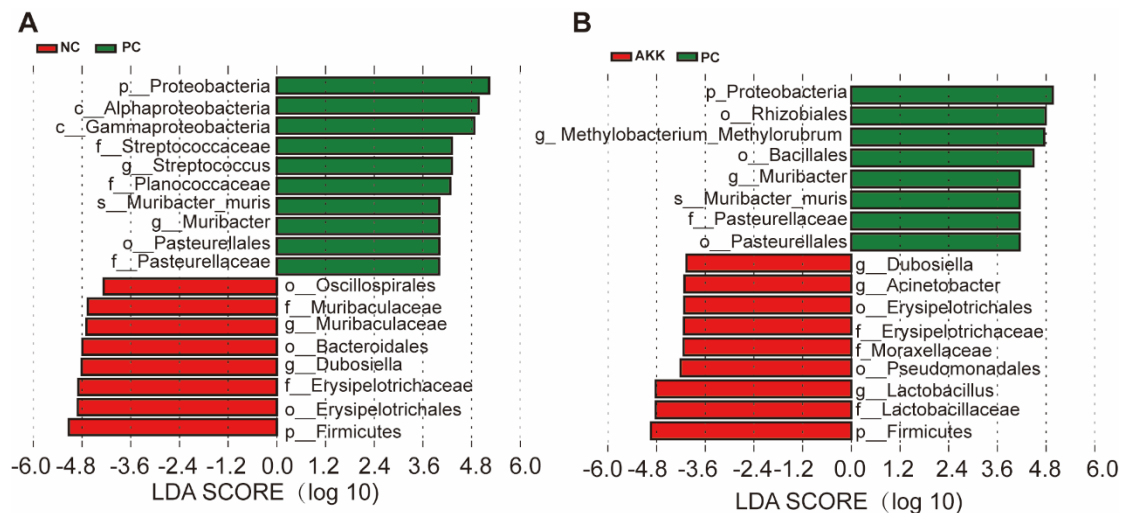

**Supplementary Figure 4 LefSe analyses identified the differentially abundant taxa between the NC and PC groups (A) and the PC and AKK groups (B).** NC, PBS + saline group; PC, PBS+LPS group; AKK, *A. muciniphila* + LPS group.  $n=4-5$  per group. LefSe, linear discriminant analysis effect size.

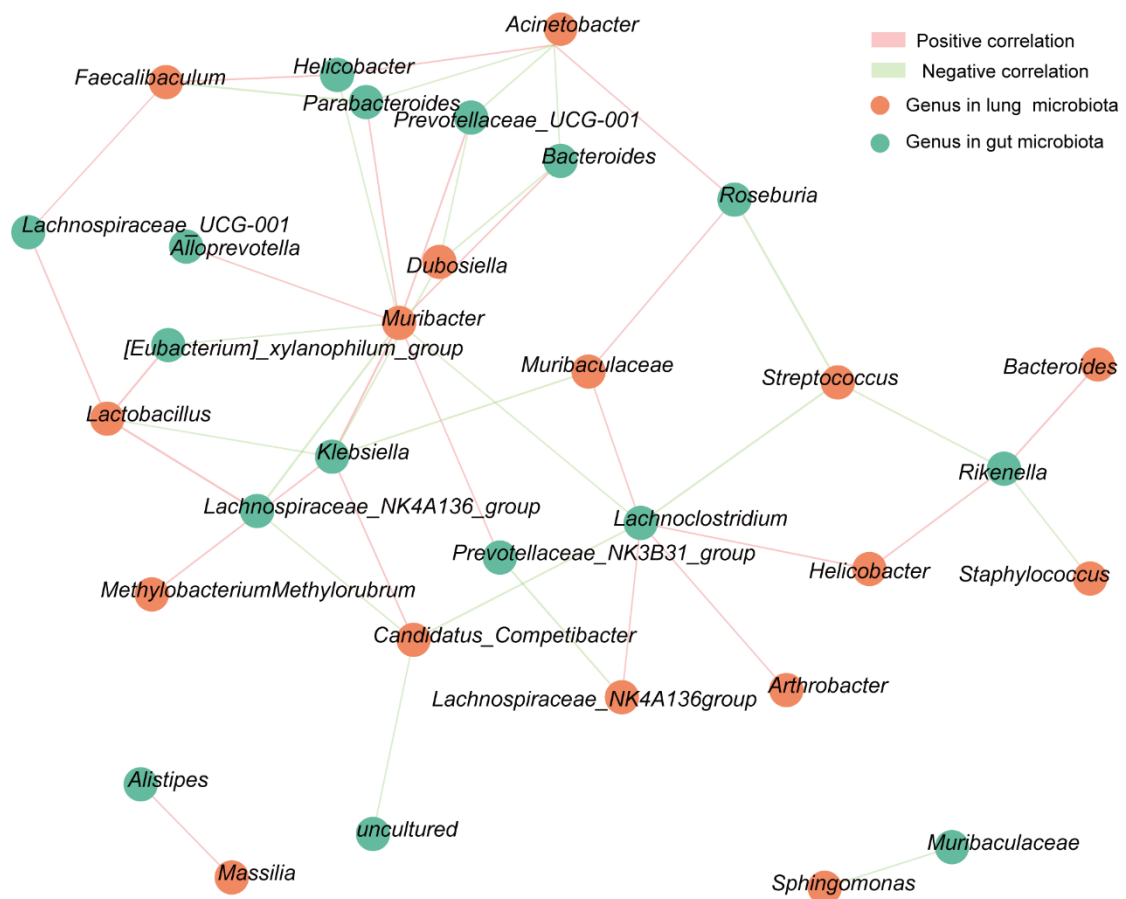

**Supplementary Figure 5** Correlation analysis between gut microbiota and lung microbiota. Spearman's rho non parametric correlation was performed and significant relationships with  $P < 0.05$  was showed. Dark green node: genus in gut microbiota. Orange node: genus in lung microbiota; The red line between nodes represents a positive relationship, while the green line represents a negative relationship.



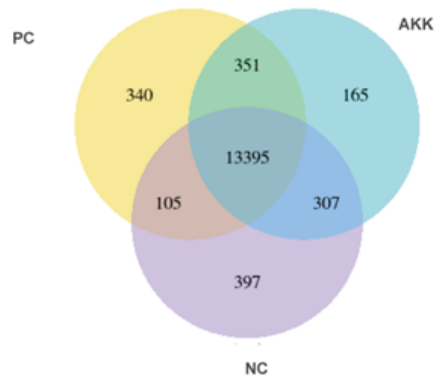

**Supplementary Figure 6 Venn diagram of three groups.** 3-4 animals per group. NC, PBS + saline group; PC, PBS+LPS group; AKK, *A. muciniphila* + LPS group.
